# Supplementary material
Source: publisher figshare collection journal article supplement (https://gsajournals.figshare.com/articles/dataset/_/8939873)
Supplement: Supplementary file 3 [file 2]

**Table S1****Strains and plasmid used in this study**

| Strain | Genotype                                                         | Reference or source        |
|--------|------------------------------------------------------------------|----------------------------|
| YPH499 | <i>MATa ura3-52 lys2-801 ade2-101 trp1-Δ63 his1-Δ200 leu2-Δ1</i> | (Sikorski and Hieter 1989) |
| YCF112 | YPH499 bar1Δ::NAT rrm3Δ::HIS3                                    | (Chen et al. 2018)         |
| YCF113 | YPH499 bar1Δ::NAT pif1-m2                                        | (Chen et al. 2018)         |
| YCF114 | YPH499 bar1Δ::NAT pif1Δ::KAN                                     | (Chen et al. 2018)         |
| YCF116 | YPH499 bar1Δ::NAT rrm3Δ::HIS3 pif1-m2::HPH                       | (Chen et al. 2018)         |
| YCF117 | YPH499 bar1Δ::NAT rrm3Δ::HIS3 pif1Δ::KAN                         | (Chen et al. 2018)         |
| YCF118 | YPH499 bar1Δ::NAT cbf1Δ::HPH                                     | (Chen et al. 2018)         |
| YCF119 | YPH499 bar1Δ::NAT cbf1Δ::HPH pif1-m2                             | This study                 |
| YCF120 | YPH499 bar1Δ::NAT cbf1Δ::HPH pif1Δ::KAN                          | This study                 |
| YCF121 | YPH499 bar1Δ::NAT cbf1Δ::HPH rrm3Δ::HIS                          | This study                 |
| YCF122 | YPH499 bar1Δ::NAT cbf1Δ::HPH rrm3Δ::HIS pif1-m2                  | This study                 |
| YCF123 | YPH499 bar1Δ::NAT cbf1Δ::HPH rrm3Δ::HIS pif1Δ::KAN               | This study                 |
| YCF128 | YPH499 tof1Δ::NAT                                                | This study                 |
| YCF129 | YPH499 tof1Δ::NAT rrm3Δ::HIS                                     | This study                 |
| YCF139 | YPH499 rnh1Δ::HPH                                                | This study                 |
| YCF140 | YPH499 rnh1Δ::HPH rnh201 Δ::TRP                                  | This study                 |
| YCF141 | YPH499 bar1Δ::NAT rnh1Δ::HPH rrm3Δ::HIS pif1-m2                  | This study                 |
| YCF142 | YPH499 bar1Δ::NAT rnh1Δ::HPH cbf1Δ::HPH                          | This study                 |
| YCF143 | YPH499 bar1Δ::NAT CBF1-MYC9                                      | This study                 |
| YCF144 | YPH499 bar1Δ::NAT CSE4-MYC9                                      | This study                 |
| YCF145 | YPH499 bar1Δ::NAT cbf1Δ::HPH CSE4-MYC9                           | This study                 |
| YCF146 | YPH499 bar1Δ::NAT rnh1Δ::HPH CSE4-MYC9                           | This study                 |
| YCF147 | YPH499 bar1Δ::NAT rrm3Δ::HIS CSE4-MYC9                           | This study                 |
| YCF148 | YPH499 bar1Δ::NAT pif1-m2 CSE4-MYC9                              | This study                 |
| YCF149 | YPH499 bar1Δ::NAT pif1-m2 rrm3Δ::HIS CSE4-MYC9                   | This study                 |
| YCF396 | YPH499 bar1Δ::NAT pif1-m2 rrm3Δ::HIS CBF1-MYC9                   | This study                 |
| YCF399 | YPH499 bar1Δ::NAT pif1-m2 CBF1-MYC9                              | This study                 |
| YCF402 | YPH499 bar1Δ::NAT rrm3Δ::HIS CBF1-MYC9                           | This study                 |
| YCF407 | YPH499 bar1Δ::NAT cbf1Δ::HPH rnh1Δ::HPH CSE4-MYC9                | This study                 |
| YCF413 | YPH499 bar1Δ::NAT rnh1Δ::HPH CBF1-MYC9                           | This study                 |

- Chen CF, Pohl TJ, Pott S, Zakian VA. 2019. Two Pif1-family DNA Helicases Cooperate in Centromere Replication and Segregation in *Saccharomyces cerevisiae*. *Genetics*.
- Sikorski RS, Hieter P. 1989. A system of shuttle vectors and yeast host strains designed for efficient manipulation of DNA in *Saccharomyces cerevisiae*. *Genetics* **122**: 19-27.
