# Supplementary material
Source: publisher figshare collection journal article supplement (https://gsajournals.figshare.com/articles/dataset/_/8939873)
Supplement: Supplementary file 4 [file 2]

**Table S2****Primer sets for ChIP-qPCR and 2-D gel**

| Primer name   | Primer sequence 5'-3'                   | Purpose |
|---------------|-----------------------------------------|---------|
| CEN3 For      | GTCACATGATGATATTTGATTTTATTATATTTTT      | RT-PCR  |
| CEN3 Rev      | TTTTAACTTTCGGAAATCAAATACACTAATATTTT     | RT-PCR  |
| CEN9 For      | TTCACGTGAAAATTTTTATATTTTAAATAAA         | RT-PCR  |
| CEN9 Rev      | AAAAACATTTTCGGAAAACAAAACCATTA           | RT-PCR  |
| CEN13 For     | ATCACATGACTACCTAACAAAATATTTATTTTT       | RT-PCR  |
| CEN13 Rev     | ATTTAAAGTTCGGAACGCATACACATTA            | RT-PCR  |
| MET17 for     | GGTCTAGAAGTTCAGGTTACG                   | RT-PCR  |
| MET17 rev     | GAAGTGGAACGATGTTGTCAC                   | RT-PCR  |
| CEN3 For      | CCCTTCCGCTTATAGTACAGTACCTATAC           | qPCR*   |
| CEN3 Rev      | CTTCCACCAGTAAACGTTTCATATATCCATTC        | qPCR*   |
| CEN6 For      | CTAGAGGATAGAAGCGTTATGGAACCTGTGCG        | qPCR*   |
| CEN6 Rev      | GTCGGTCGTCCAATATCATCGTAAACGTG           | qPCR*   |
| CEN9 For      | CGGATGAATATTGCCAATGACTGCTGC             | qPCR    |
| CEN9 Rev      | GCTGAAGCTTGCCTCTGTATGTAAAGTATCTAAA      | qPCR    |
| CEN11 For     | AGTTTACTCTCCTTTCTATGTGTATTTG            | qPCR*   |
| CEN11 Rev     | CTGCATTTATCTTTCTCTTGAACCGTAAATA         | qPCR*   |
| CEN12 For     | ACTTGTAGTACGAGGTTAACATAAGAAAGAAAGAG     | qPCR*   |
| CEN12 Rev     | GTTGAATATTTGAAGTACACACCCGCGTAAAGAG      | qPCR*   |
| CEN13 For     | ATCACATGACTACCTAACAAAATATTTATTTTT       | qPCR*   |
| CEN13 Rev     | ATTTAAAGTTCGGAACGCATACACATTA            | qPCR*   |
| Tel VI-R, For | TTTAACGGTGATTATTAGGTGGATTTTATATTAGTCTAC | qPCR**  |
| Tel VI-R, Rev | CTTCACTCCATTGCGCCCATG                   | qPCR**  |
| CEN6 DEG1 For | AGCGATTTCAACAGGTACCA                    | 2D gel* |
| CEN6 DEG1 Rev | AACAACCTTCGACAGGTTCCA                   | 2D gel* |

\* These primer sets were used in (Chen et al. 2018).

\*\* This primer set was used in (Fisher et al. 2004).
