# Supplementary material
Source: publisher figshare collection journal article supplement (https://gsajournals.figshare.com/articles/dataset/_/8939873)
Supplement: Supplementary file 6 [file 2]

**Figure S5. The levels of cen-RNA late in the cell cycle in synchronized cells of indicated strains**

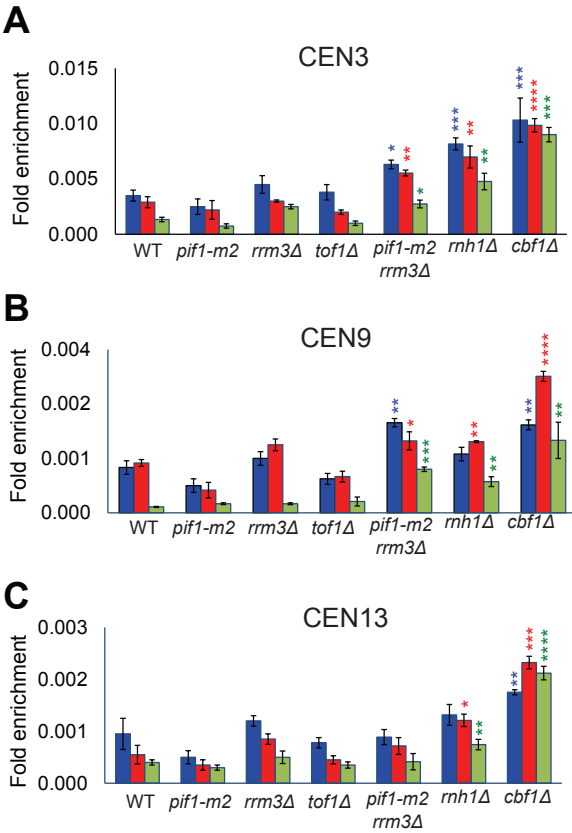

**D**

| Fold increase of RNA expression related to WT   |         |         |         |  |
|-------------------------------------------------|---------|---------|---------|--|
| Fold increase of Cen3 RNA level relative to WT  |         |         |         |  |
| Strains                                         | 45 mins | 60 mins | 75 mins |  |
| <i>pif1-m2 rrm3Δ</i>                            | 1.8*    | 1.9**   | 2*      |  |
| <i>rnh1Δ</i>                                    | 2.3***  | 2.4**   | 3.6**   |  |
| <i>cbf1Δ</i>                                    | 2.9***  | 3.4**** | 6.7***  |  |
| Fold increase of Cen9 RNA level relative to WT  |         |         |         |  |
| Strains                                         | 45 mins | 60 mins | 75 mins |  |
| <i>pif1-m2 rrm3Δ</i>                            | 1.9**   | 1.4*    | 7.3***  |  |
| <i>rnh1Δ</i>                                    | 1.3     | 1.4**   | 5.3**   |  |
| <i>cbf1Δ</i>                                    | 1.9**   | 2.7**** | 12.3**  |  |
| Fold increase of Cen13 RNA level relative to WT |         |         |         |  |
| Strains                                         | 45 mins | 60 mins | 75 mins |  |
| <i>pif1-m2 rrm3Δ</i>                            | 0.9     | 1.3     | 1       |  |
| <i>rnh1Δ</i>                                    | 1.4     | 2.2*    | 1.9**   |  |
| <i>cbf1Δ</i>                                    | 1.8**   | 4.2**** | 5.3**** |  |
