# Supplementary material
Source: publisher figshare collection journal article supplement (https://gsajournals.figshare.com/articles/dataset/_/8939873)

**Figure S1. Properties of the *cbf1Δ* strain used in this study**

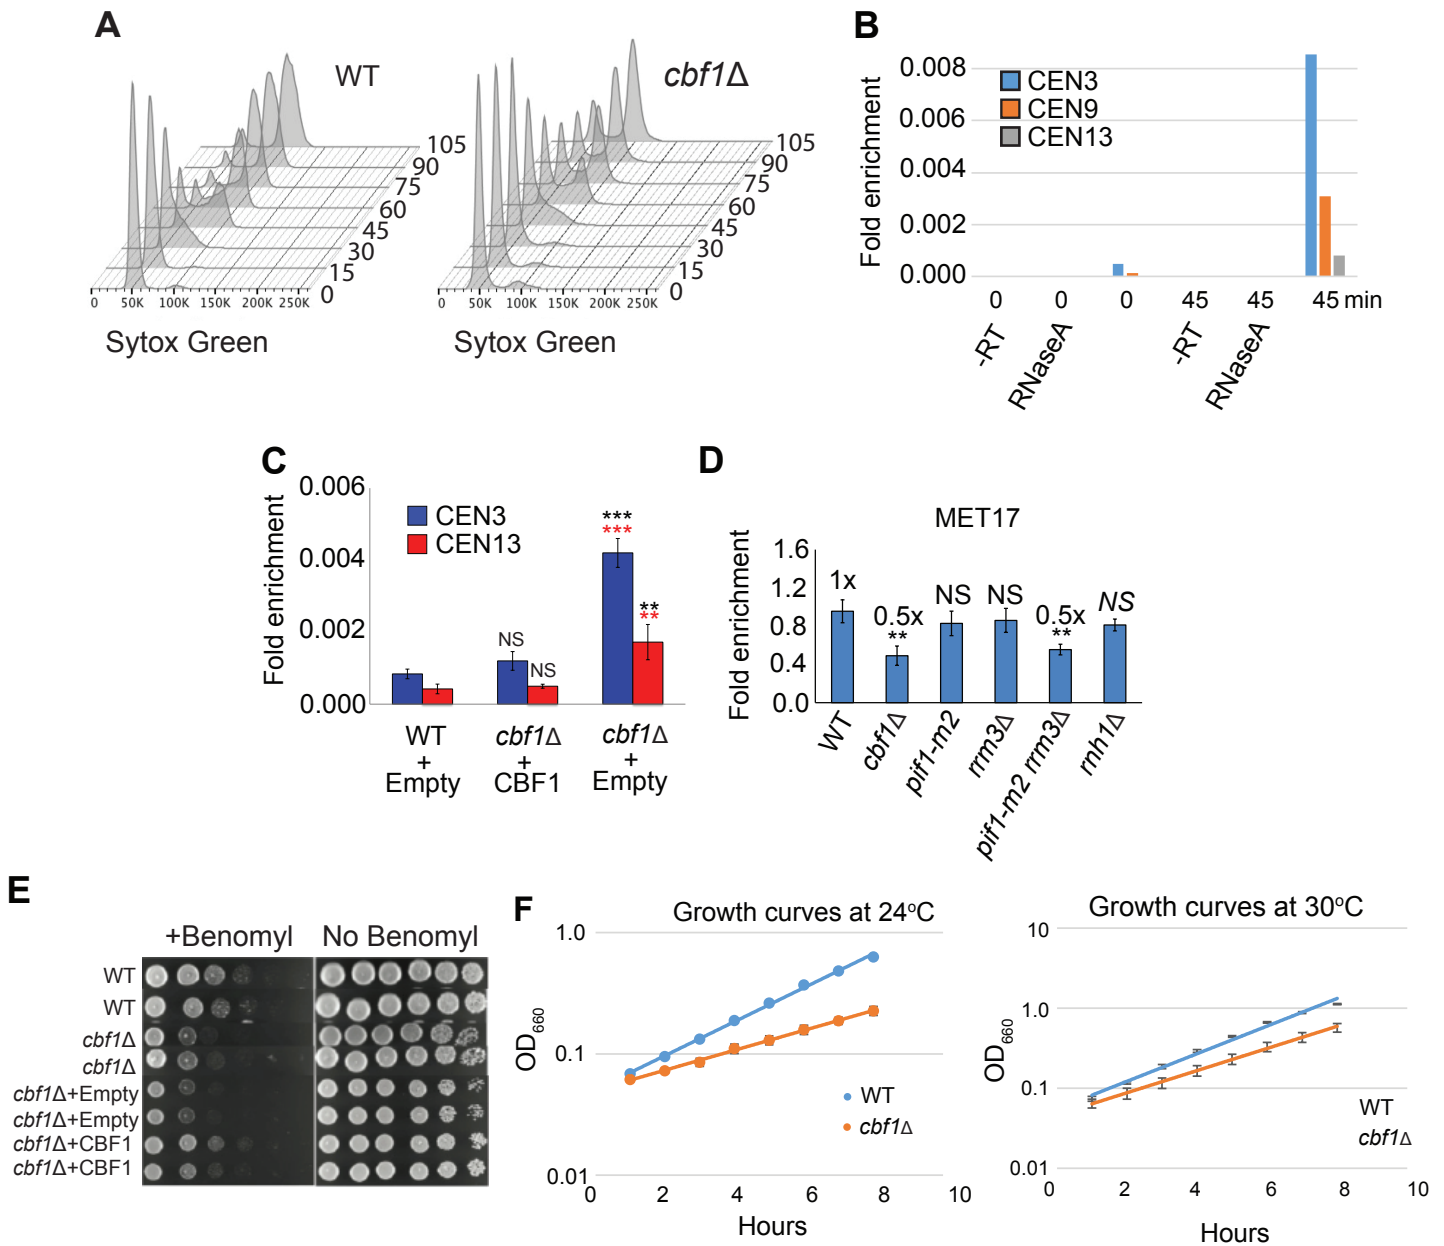

Supplement: Supplementary file 1 [file 2]

**Figure S2. Cell cycle distribution of mutant and WT cells in asynchronous cultures**

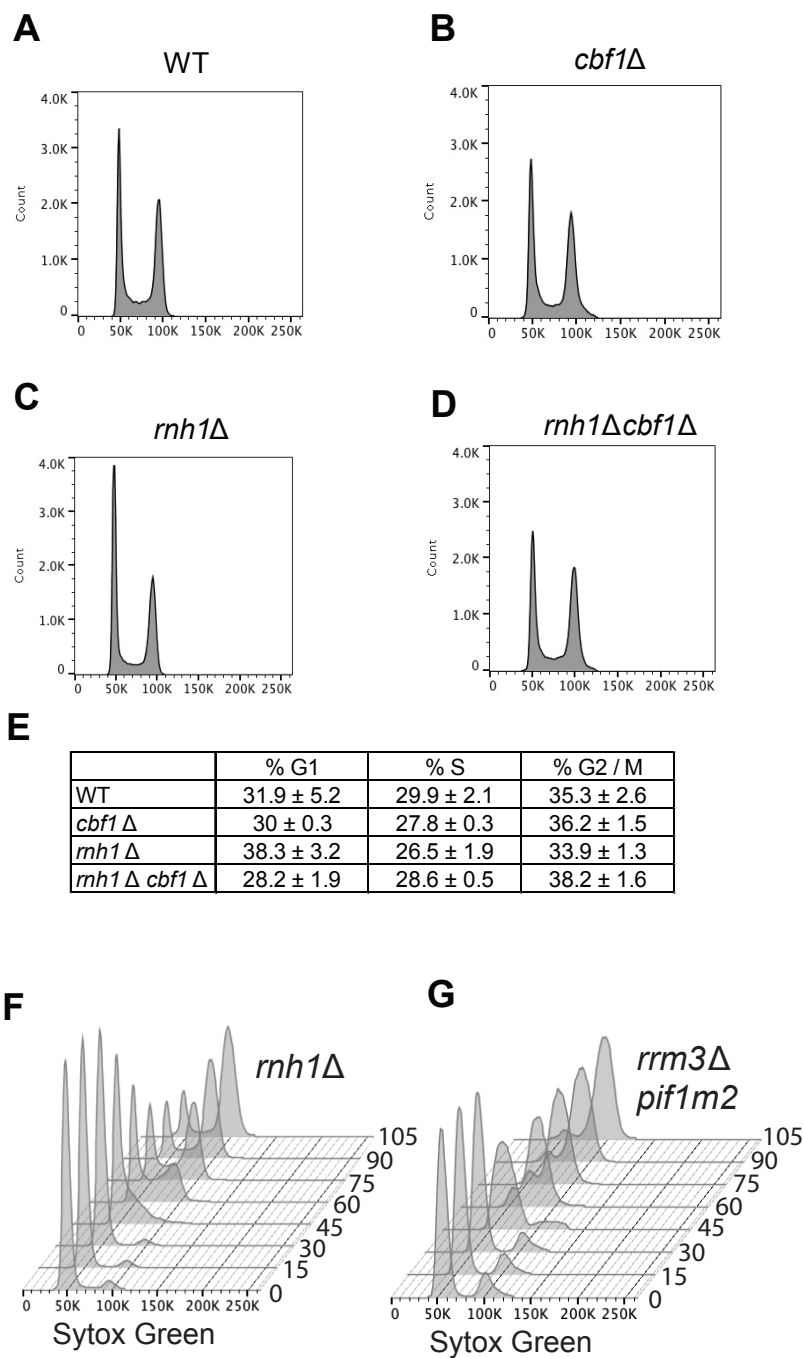

Supplement: Supplementary file 2 [file 2]

**Figure S3. FACS data for Cbf1-Myc synchrony and asynchronous binding at CEN11, CEN12, and Telomere VI-R**

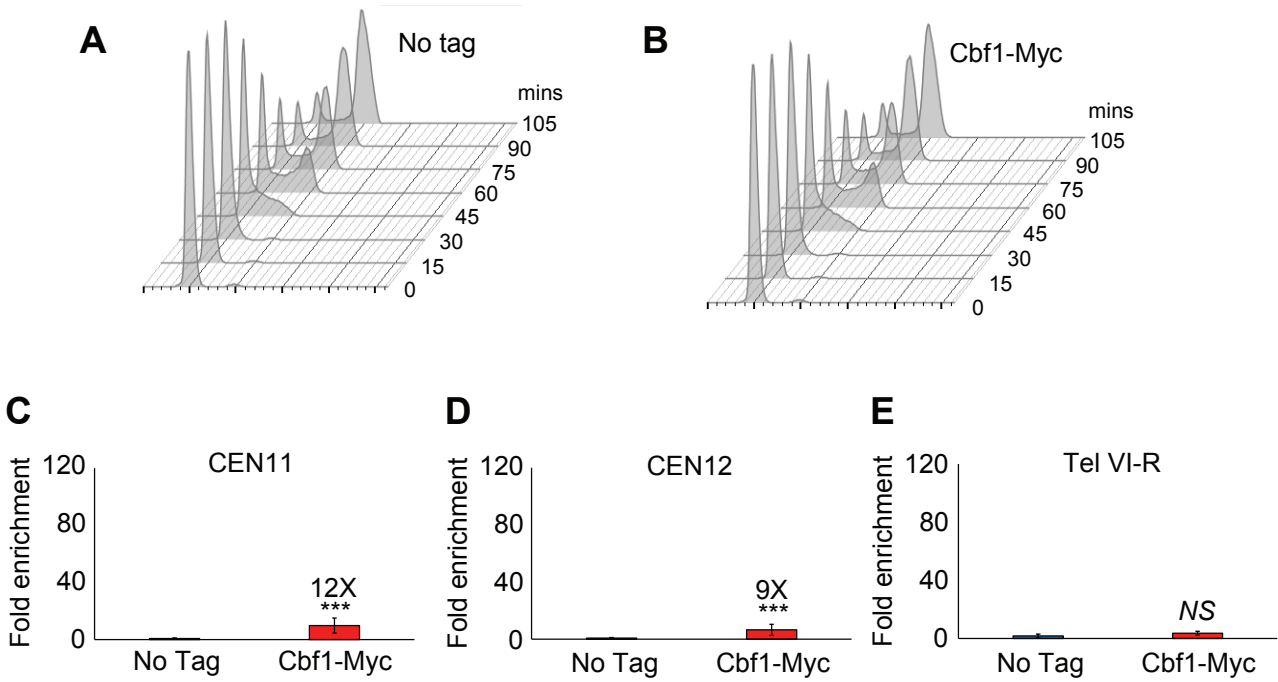

Supplement: Supplementary file 5 [file 2]

**Figure S4. Validation of internal Myc tag of Cbf1 and Cse4**

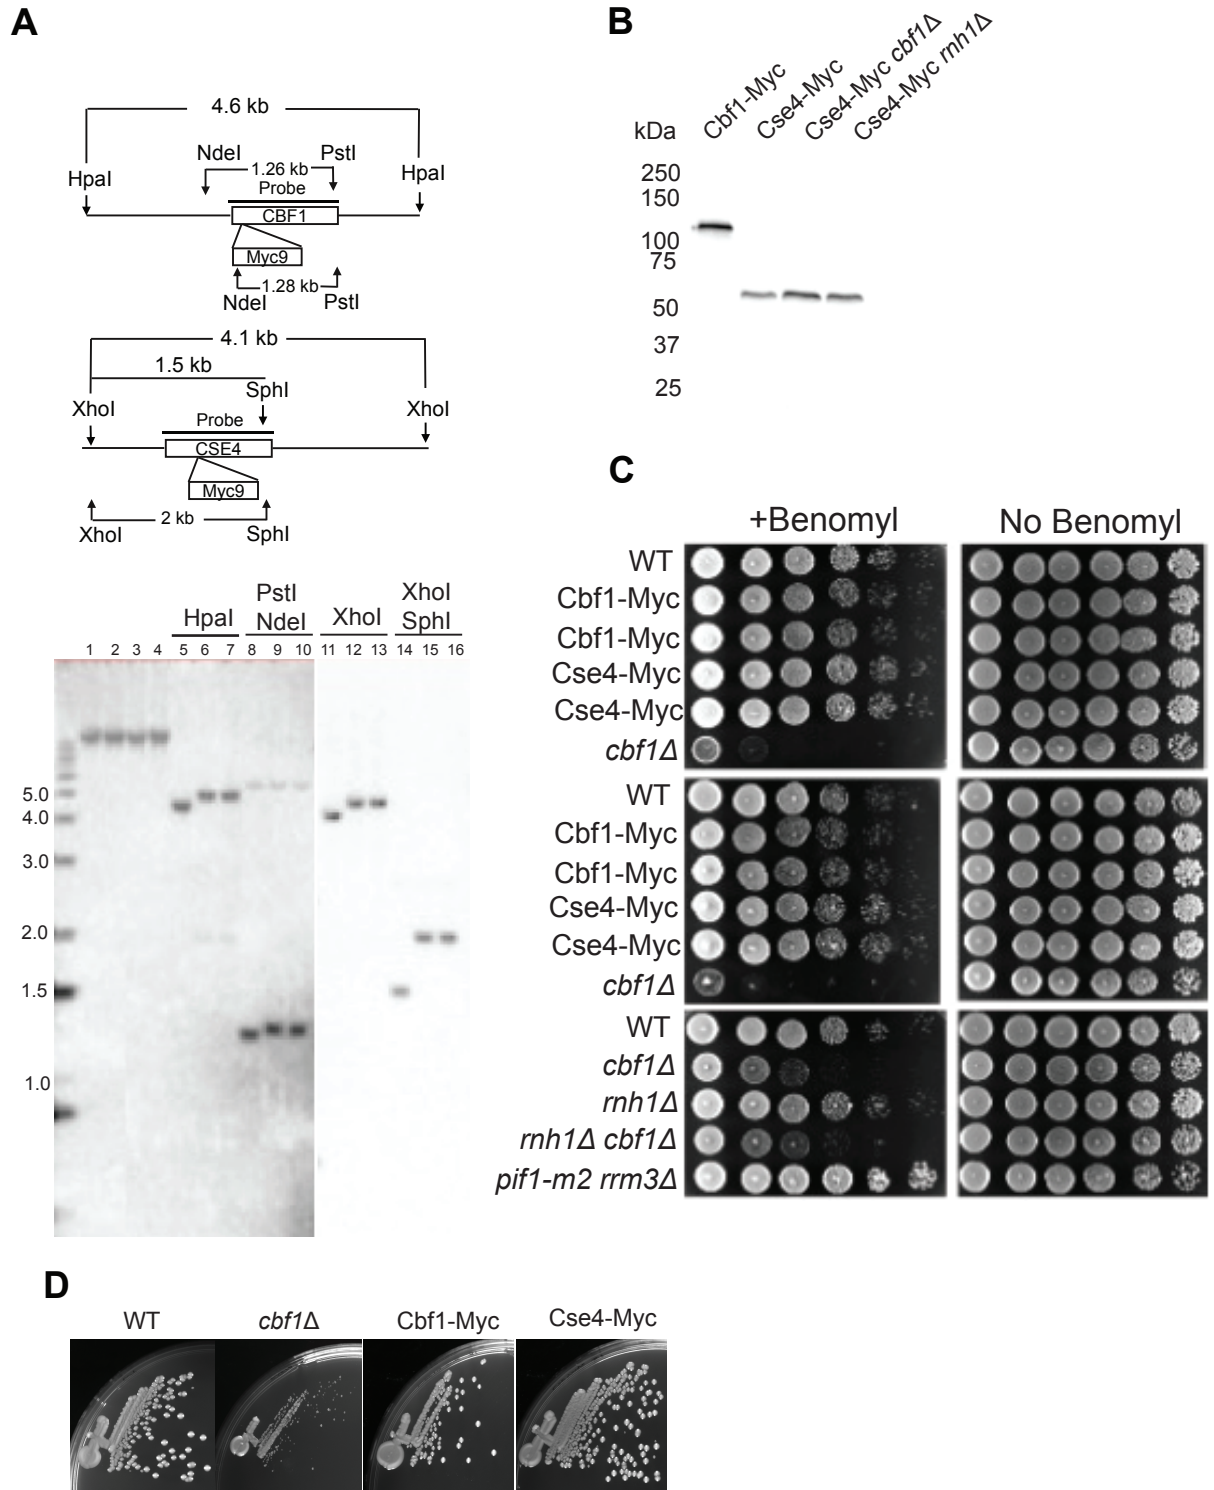

Supplement: Supplementary file 7 [file 2]
